# Supplementary material for: Presence of Multiple Genetic Mutations Related to Insecticide Resistance in Chinese Field Samples of Two Phthorimaea Pest Species
Source: MDPI journal article supplement (doi:10.3390/insects15030194), 2024-03-14
Supplement: s1 [file s1]

**Table S1.1 Primers for species identification**

| Gene | Primer   | Sequences                        | Amplicon length |
|------|----------|----------------------------------|-----------------|
| COI  | LCO1490F | 5'-GGTCAACAAATCATAAAGATATTGG-3'  | ~700bp          |
|      | HCO2198  | 5'-TAAACTTCAGGGTGACCAAAAAATCA-3' |                 |

**Table S1.2 Primers for sequence amplification**

| Gene        | Primer           | Sequence                            | Amplicon length |
|-------------|------------------|-------------------------------------|-----------------|
| <i>VGSC</i> | <i>PoVGSC</i> -F | 5'-TCATTGTGGCCTTATCACTGTTGGA-3'     | ~2500bp         |
|             | <i>PoVGSC</i> -R | 5'-GTAACAGAGCTAAGAAGAGATTAAGTAC-3'  |                 |
|             | <i>PaVGSC</i> -F | 5'-AATTGCAGCTTCGAGTATTCAAATTGG-3'   | ~1600bp         |
|             | <i>PaVGSC</i> -R | 5'-GGGAGCGTGTATTGCTATCTGGT-3'       |                 |
| <i>Acel</i> | <i>PoAcel</i> -F | 5'-ATGCGCGTAGTGTTGGCCGCCCT-3'       | ~3500bp         |
|             | <i>PoAcel</i> -R | 5'-TCATATGATGTACTTAGACAGCATTGAAT-3' |                 |
|             | <i>PaAcel</i> -F | 5'-ATGCGCGTAGTGTTGGCCGCCC-3'        | ~3500bp         |
|             | <i>PaAcel</i> -R | 5'-TCATATGATGTACTTAGACAGCATA-3'     |                 |
| <i>RDL</i>  | <i>PoRdl</i> -F  | 5'-GAAATTACTCAAGACTGGCTTGTGAG-3'    | ~650bp          |
|             | <i>PoRdl</i> -R  | 5'-CGAGTAGCTTACCGAAGGTCTACC-3'      |                 |

*PaRdl*-F

5'-GAAATTACTCAAGACTGGCTTGTGA-3'

~1000bp

*PaRdl*-R

5'-CGAAGGTCTACCGGGTGGA-3'

---

**Table S1.3 Primers for sequencing**

| Gene        | Primer                   | Sequence                           |
|-------------|--------------------------|------------------------------------|
| <i>VGSC</i> | <i>PoVGSC</i> -intron18F | 5'-CACGTTATAAAGCTATGCCACGCAG-3'    |
|             | <i>PoVGSC</i> -exon21R   | 5'-GTAACAGAGCTAAGAAGAGATTAAGTAC-3' |
|             | <i>PaVGSC</i> -exon17F   | 5'-AATTGCAGCTTCGAGTATTCAAATTGG-3'  |
|             | <i>PaVGSC</i> -exon18F   | 5'-CGTTGATCGTTTTCCCGATGGAG-3'      |
| <i>Ace1</i> | <i>PoAce1</i> -exon1F    | 5'-CCGAACACAGATATGCAGGAAGAC-3'     |
|             | <i>PaAce1</i> -exon1F    | 5'-TTCCCGGCGCGATGATGTGGAATC-3'     |
| <i>RDL</i>  | <i>PoRdl</i> -F          | 5'-GAAATTACTCAAGACTGGCTTGTGAG-3'   |
|             | <i>PaRdl</i> -F          | 5'-GAAATTACTCAAGACTGGCTTGTGA-3'    |
