# Supplementary material for: Presence of Multiple Genetic Mutations Related to Insecticide Resistance in Chinese Field Samples of Two Phthorimaea Pest Species
Source: MDPI journal article supplement (doi:10.3390/insects15030194), 2024-03-14
Supplement: s1 [file s1]

**TableS3 Informations on field strain of *P. operculella* and *P. absoluta* used in the present study.** All strains, except XS strain from tomato plants, were collected from potato plants.

| Species                        | Strain | Collection location            | Coordinate            | Date         | Stage |
|--------------------------------|--------|--------------------------------|-----------------------|--------------|-------|
| <i>Phthorimaea operculella</i> | ML     | Malong District, Qujing City   | 103°34'50"; 25°16'24" | April, 2023  | Larva |
|                                | LL     | Luliang County, Qujing City    | 103°40'48"; 25°9'51"  | April, 2023  | Larva |
|                                | XW     | Xuanwei City, Qujing City      | 104°04'28"; 26°05'52" | August, 2023 | Larva |
| <i>Phthorimaea absoluta</i>    | PL     | Panlong District, Kunming City | 102°44'56"; 25°7'42"  | April, 2023  | Larva |
|                                | GD     | Guandu District, Kunming City  | 102°56'51"; 25°10'40" | April, 2023  | Larva |
|                                | XS     | Xinshi District, Urumqi City   | 87°29'47"; 43°57'6"   | August, 2023 | Larva |
