# Supplementary material for: Presence of Multiple Genetic Mutations Related to Insecticide Resistance in Chinese Field Samples of Two Phthorimaea Pest Species
Source: MDPI journal article supplement (doi:10.3390/insects15030194), 2024-03-14
Supplement: s1 [file s1]

**TableS2.1 Sequence information for the divergence time analysis**

| Types                              | Species                          | GenBank Accession Numbers |
|------------------------------------|----------------------------------|---------------------------|
| the COI gene of <i>Gelechiidae</i> | <i>Scrobipalpa costella</i>      | OX463325.1                |
|                                    | <i>Teleiodes luculella</i>       | OX419612.1                |
|                                    | <i>Keiferia lycopersicella</i>   | JN305836.1                |
|                                    | <i>Phthorimaea operculella</i>   | NC_057501.1               |
|                                    | <i>Scrobipalpa atriplicella</i>  | JARACY010001406.1         |
|                                    | <i>Tuta absoluta</i>             | NC_050874.1               |
|                                    | <i>Pectinophora gossypiella</i>  | KM225795.1                |
|                                    | <i>Carpatolechia fugitivella</i> | OX579675.1                |
|                                    | <i>Athrips mouffetella</i>       | OX383987.1                |

---

|                                |             |
|--------------------------------|-------------|
| <i>Aproaerema taeniolella</i>  | OX465273.1  |
| <i>Anarsia innoxia</i>         | OX387421.1  |
| <i>Plutella xylostella</i>     | NC_025322.1 |
| <i>Spodoptera frugiperda</i>   | NC_027836.1 |
| <i>Helicoverpa armigera</i>    | NC_014668.1 |
| <i>Drosophila melanogaster</i> | AF200828.1  |

---

**TableS2.2 Sequence information for haplotypes**

| Types                        | Species                 | GenBank Accession Numbers |
|------------------------------|-------------------------|---------------------------|
| the haplotype of <i>VGSC</i> | <i>PoVGSC</i> exon19-H1 | OR963514                  |
|                              | <i>PoVGSC</i> exon20-H1 | OR963515                  |
|                              | <i>PoVGSC</i> exon20-H2 | OR963516                  |
|                              | <i>PoVGSC</i> exon20-H3 | OR963517                  |
|                              | <i>PaVGSC</i> exon17-H1 | OR963518                  |
|                              | <i>PaVGSC</i> exon17-H2 | OR963519                  |
|                              | <i>PaVGSC</i> exon17-H3 | OR963520                  |
|                              | <i>PaVGSC</i> exon17-H4 | OR963521                  |
|                              | <i>PaVGSC</i> exon17-H5 | OR963522                  |
|                              | <i>PaVGSC</i> exon17-H6 | OR963523                  |

---

|                              |                         |          |
|------------------------------|-------------------------|----------|
|                              | <i>PaVGSC</i> exon17-H7 | OR963524 |
|                              | <i>PaVGSC</i> exon17-H8 | OR963525 |
|                              | <i>PaVGSC</i> exon17-H9 | OR963526 |
|                              | <i>PaVGSC</i> exon18-H1 | OR963527 |
| the haplotype of <i>Acel</i> | <i>PoAcel</i> -H1       | OR963498 |
|                              | <i>PoAcel</i> -H2       | OR963499 |
|                              | <i>PoAcel</i> -H3       | OR963500 |
|                              | <i>PoAcel</i> -H4       | OR963501 |
|                              | <i>PoAcel</i> -H5       | OR963502 |
|                              | <i>PoAcel</i> -H6       | OR963503 |
|                              | <i>PaAcel</i> -H1       | OR963504 |

---

---

|                             |                   |          |
|-----------------------------|-------------------|----------|
| the haplotype of <i>RDL</i> | <i>PaAcel</i> -H2 | OR963505 |
|                             | <i>PaAcel</i> -H3 | OR963506 |
|                             | <i>PaAcel</i> -H4 | OR963507 |
|                             | <i>PoRDL</i> -H1  | OR963508 |
|                             | <i>PaRDL</i> -H1  | OR963509 |
|                             | <i>PaRDL</i> -H2  | OR963510 |
|                             | <i>PaRDL</i> -H3  | OR963511 |
|                             | <i>PaRDL</i> -H4  | OR963512 |
|                             | <i>PaRDL</i> -H5  | OR963513 |

---
